# Supplementary material for: Coordinatively Unsaturated Nickel Nitroxyl Complex: Structure, Physicochemical Properties, and Reactivity toward Dioxygen
Source: MDPI journal article supplement (doi:10.3390/molecules28176206), 2023-08-23
Supplement: s1 [file s1]

**Coordinatively Unsaturated Nickel Nitrosyl Complex: Structure, Physicochemical Properties, and Reactivity toward Dioxygen**

Kiyoshi Fujisawa, Taisei Kataoka, Kohei Terashima,  
Felipe de Santis Gonçalves, Nicolai Lehnert

Content

|                    |                                                                                                                                                                     |     |
|--------------------|---------------------------------------------------------------------------------------------------------------------------------------------------------------------|-----|
| <b>Figure S1.</b>  | IR spectrum of $[\text{Ni}(\text{NO})(\text{I})(\text{L1}'')] (\text{KBr})$ .                                                                                       | S2  |
| <b>Figure S2.</b>  | Far-IR spectrum of $[\text{Ni}(\text{NO})(\text{I})(\text{L1}'')] (\text{KBr})$ .                                                                                   | S2  |
| <b>Figure S3.</b>  | IR and UV-Vis spectra of the starting material $[\text{Ni}(\text{NO})(\text{I})]_n$ .                                                                               | S3  |
| <b>Figure S4.</b>  | UV-Vis spectrum of $[\text{Ni}(\text{NO})(\text{I})(\text{L1}'')] (\text{solid state (nujol)})$ .                                                                   | S3  |
| <b>Figure S5.</b>  | $^1\text{H}$ -NMR spectrum of $[\text{Ni}(\text{NO})(\text{I})(\text{L1}'')] (\text{in } \text{CDCl}_3\text{-}d_1)$ .                                               | S4  |
| <b>Figure S6.</b>  | $^1\text{H}$ -NMR spectrum of $[\text{Ni}(\text{NO})(\text{I})(\text{L1}'')] (\text{in } (\text{CD}_3)_2\text{CO-}d_6)$ .                                           | S4  |
| <b>Figure S7.</b>  | $^{13}\text{C}$ -NMR spectrum of $[\text{Ni}(\text{NO})(\text{I})(\text{L1}'')] (\text{in } \text{CDCl}_3\text{-}d_1)$ .                                            | S5  |
| <b>Figure S8.</b>  | IR spectrum of $[\text{Ni}(\kappa^2\text{-NO}_2)(\text{L1}'')_2](\text{I}_3) (\text{KBr})$ .                                                                        | S6  |
| <b>Figure S9.</b>  | Far-IR spectrum of $[\text{Ni}(\kappa^2\text{-NO}_2)(\text{L1}'')_2](\text{I}_3) (\text{KBr})$ .                                                                    | S6  |
| <b>Figure S10.</b> | IR spectral comparisons of the reaction of $[\text{Ni}(\text{NO})(\text{I})(\text{L1}'')] (\text{with } ^{16}\text{O}_2 \text{ and } ^{18}\text{O}_2)$ .            | S7  |
| <b>Figure S11.</b> | UV-Vis spectrum of $[\text{Ni}(\kappa^2\text{-O}_2\text{N})(\text{L1}'')_2](\text{I}_3) (\text{in solid state (nujol)})$ .                                          | S7  |
| <b>Table S1.</b>   | XYZ coordinates for the optimized structure of $[\text{Ni}(\text{NO})(\text{I})(\text{L1}'')] (\text{using the BP86 functional for the closed-shell system})$ .     | S8  |
| <b>Table S2.</b>   | XYZ coordinates for the optimized structure of $[\text{Ni}(\text{NO})(\text{I})(\text{L1}'')] (\text{using the B3LYP functional for the closed-shell system})$ .    | S10 |
| <b>Table S3.</b>   | XYZ coordinates for the optimized structure of $[\text{Ni}(\text{NO})(\text{I})(\text{L1}'')] (\text{using the B3LYP functional for the broken-symmetry system})$ . | S12 |
| <b>Table S4.</b>   | XYZ coordinates for the optimized structure of $[\text{Ni}(\kappa^2\text{-O}_2\text{N})(\text{L1}'')_2] (\text{using the BP86 functional})$ .                       | S14 |

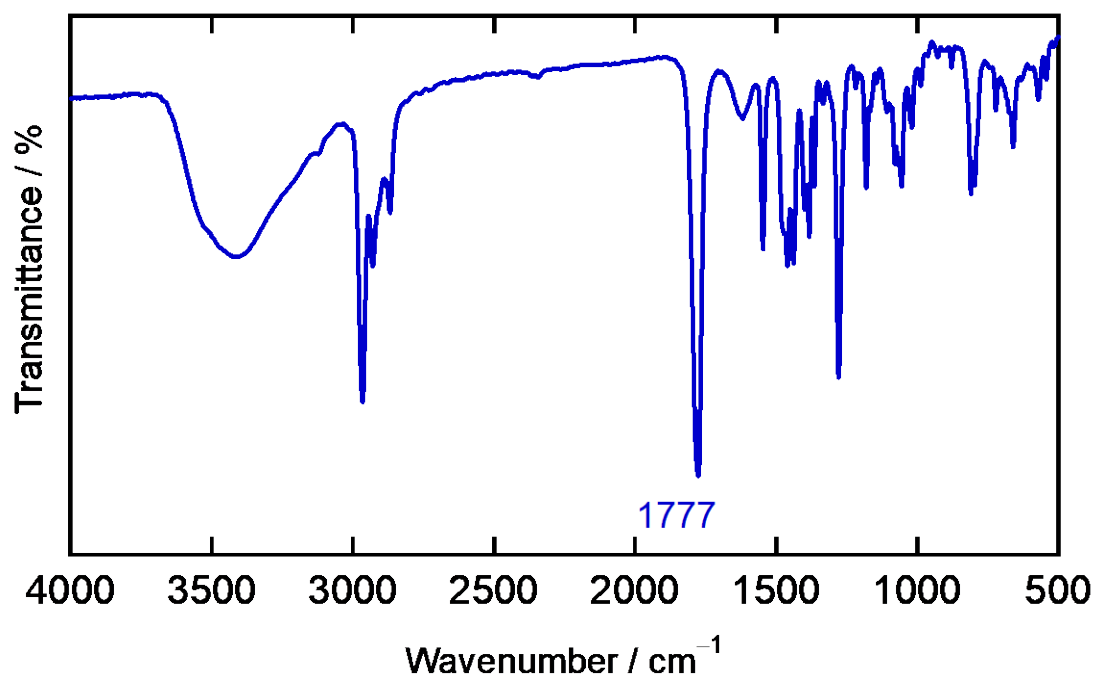

Figure S1. IR spectrum of [Ni(NO)(I)(L1'')] (KBr) at room temperature.

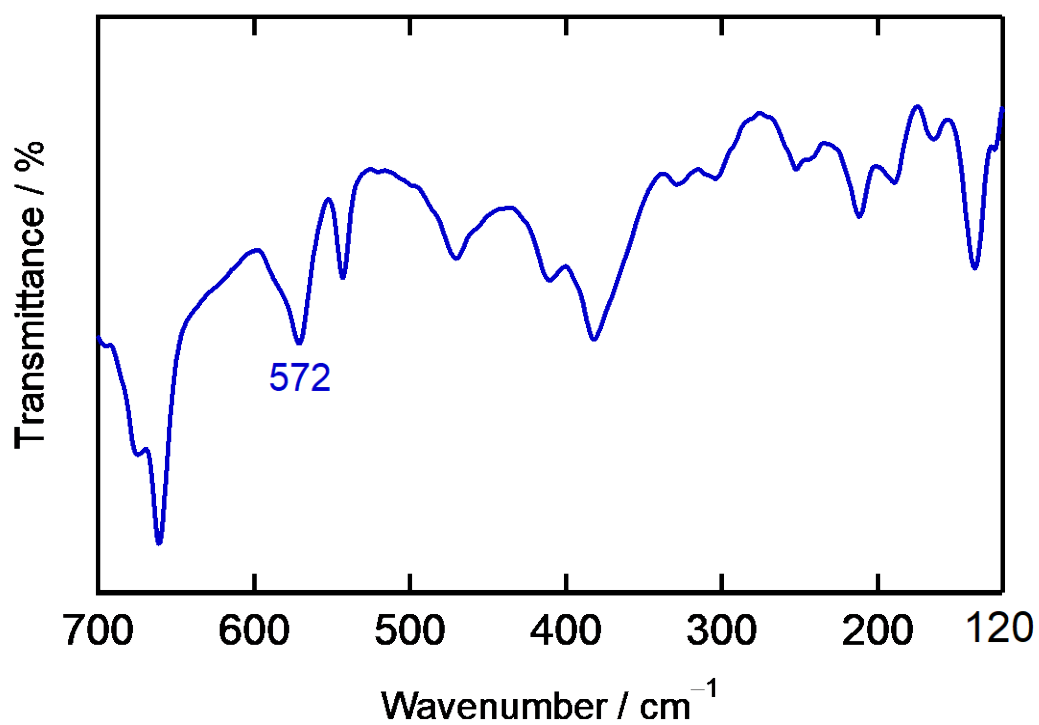

Figure S2. Far-IR spectrum of [Ni(NO)(I)(L1'')] (CsI) at room temperature.

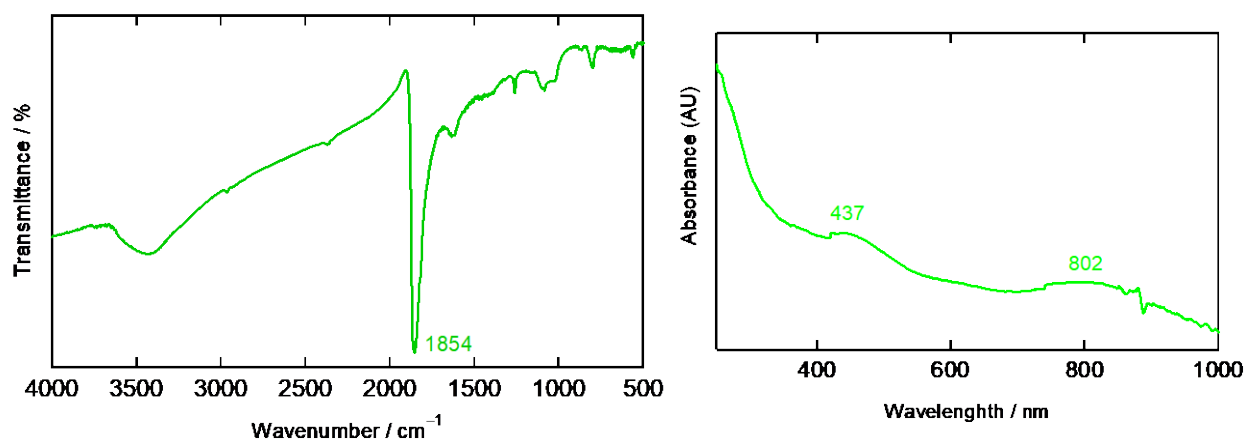

**Figure S3.** IR (KBr, left) and UV-Vis (nujol, right) spectra of the starting material  $[\text{Ni}(\text{NO})(\text{I})]_n$ , obtained at room temperature.

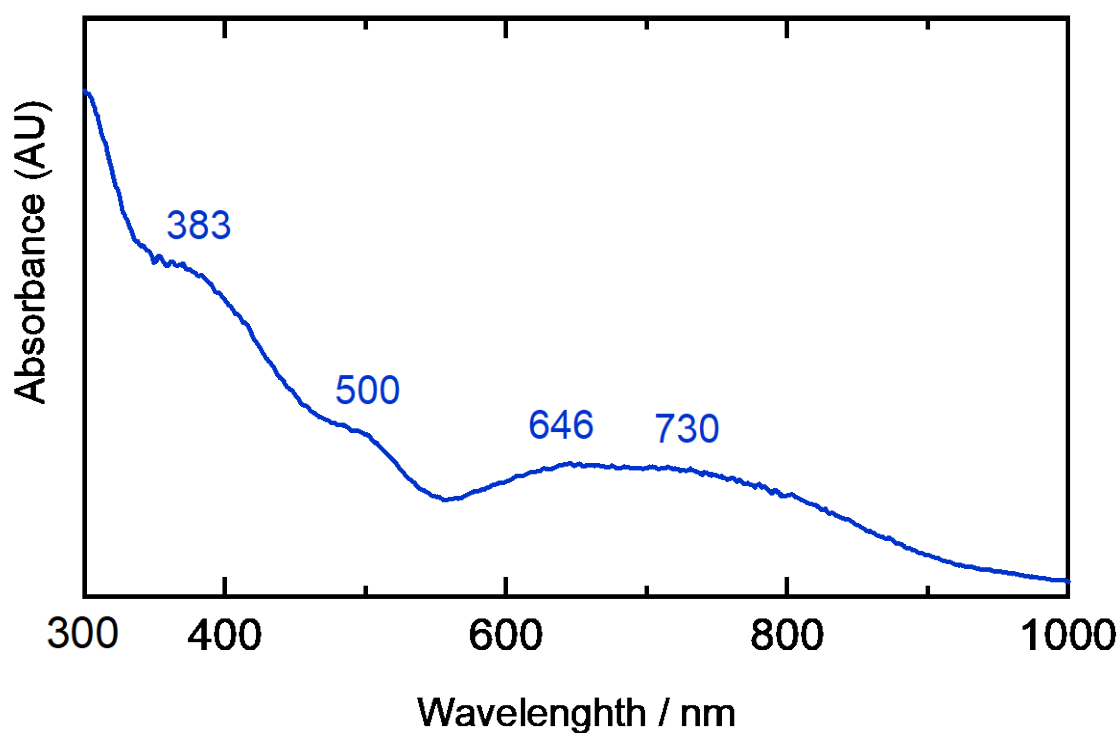

**Figure S4.** UV-Vis spectrum of  $[\text{Ni}(\text{NO})(\text{I})(\text{L1}'')]_n$  in the solid state (nujol) at room temperature.

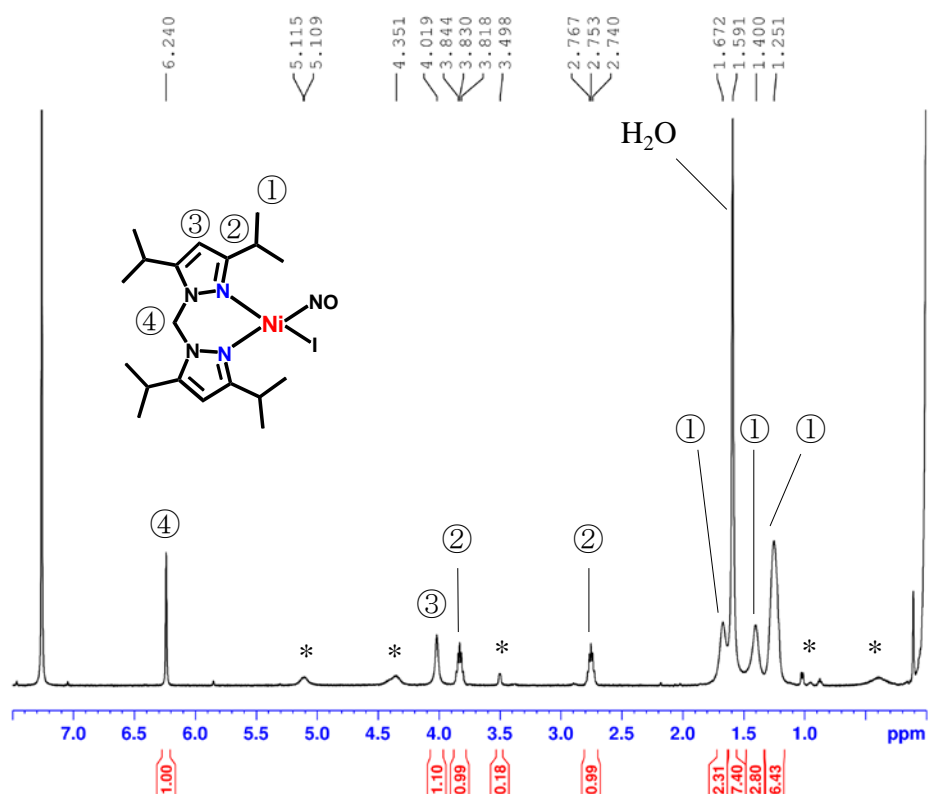

**Figure S5.**  $^1\text{H}$ -NMR spectrum of  $[\text{Ni}(\text{NO})(\text{I})(\text{L1}'')]$  in  $\text{CDCl}_3\text{-}d_1$  at room temperature (\* marks solvents and impurities peaks).

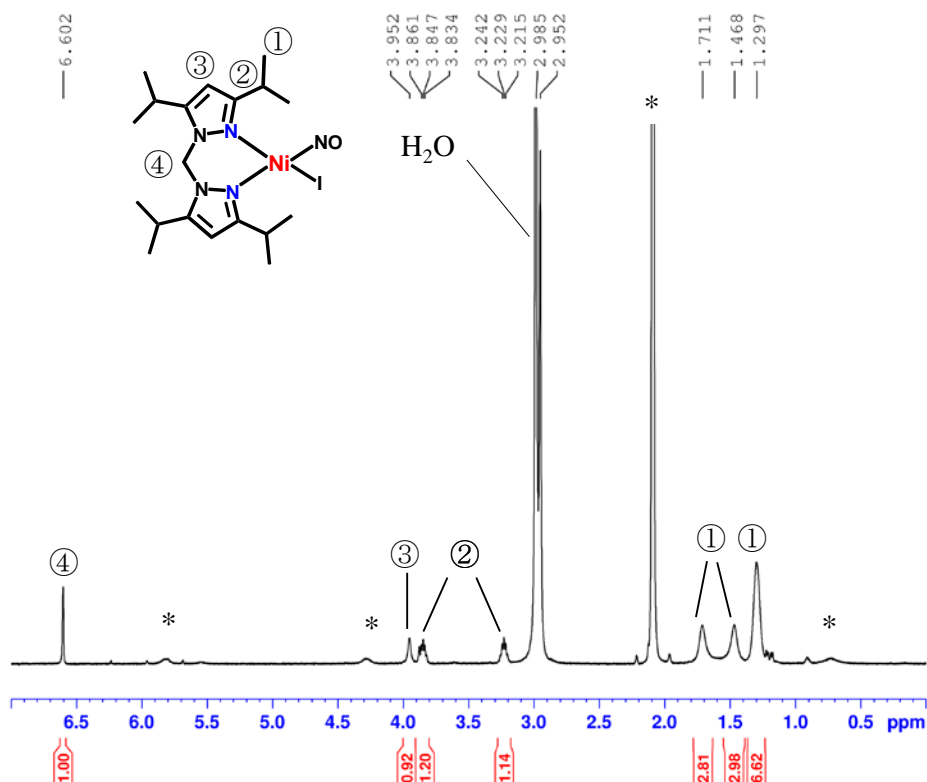

**Figure S6.**  $^1\text{H}$ -NMR spectrum of  $[\text{Ni}(\text{NO})(\text{I})(\text{L1}'')]$  in  $(\text{CD}_3)_2\text{CO-}d_6$  at room temperature (\* marks solvents and impurities peaks).

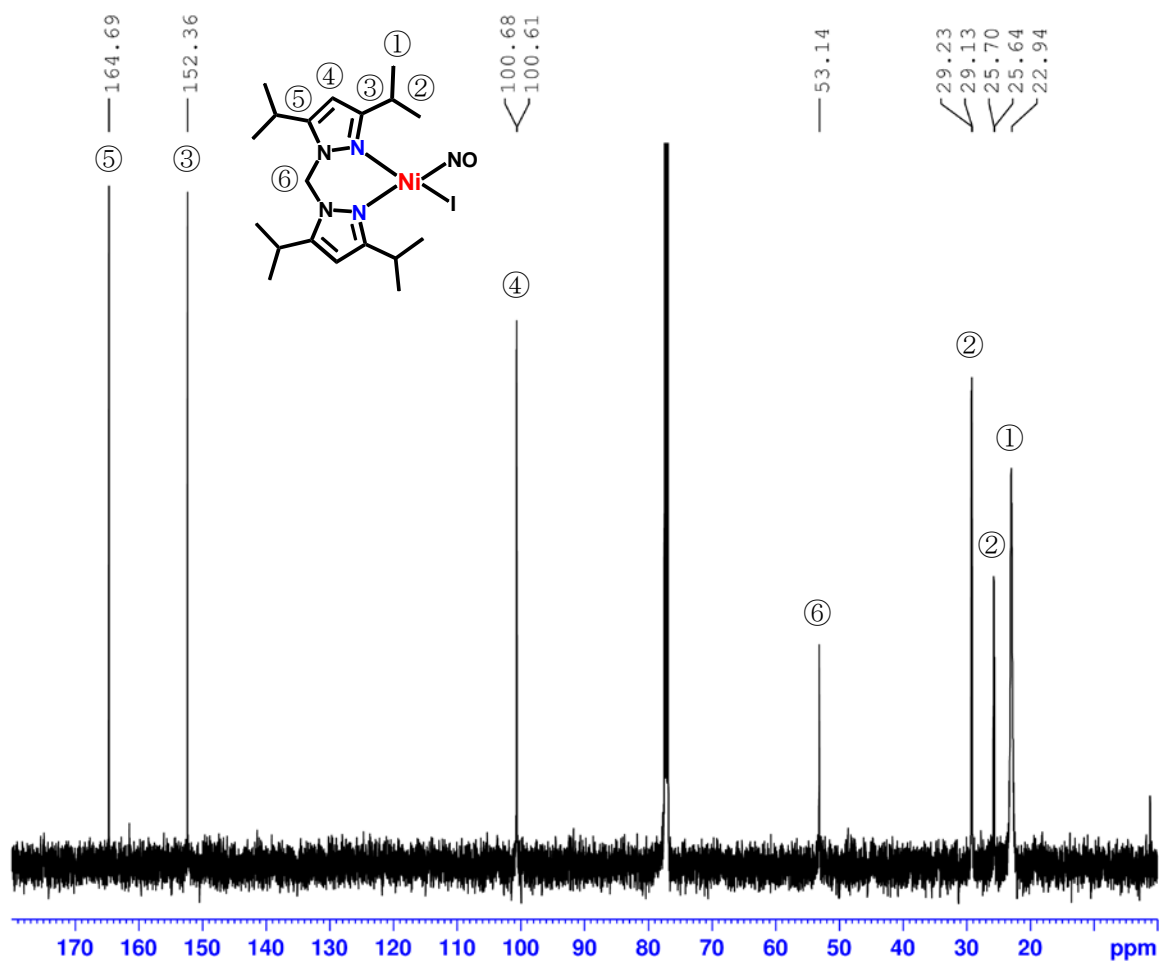

**Figure S7.**  $^{13}\text{C}$ -NMR spectrum of  $[\text{Ni}(\text{NO})(\text{I})(\text{L1}'')]$  in  $\text{CDCl}_3-d_1$  at room temperature (\* marks solvents peaks).

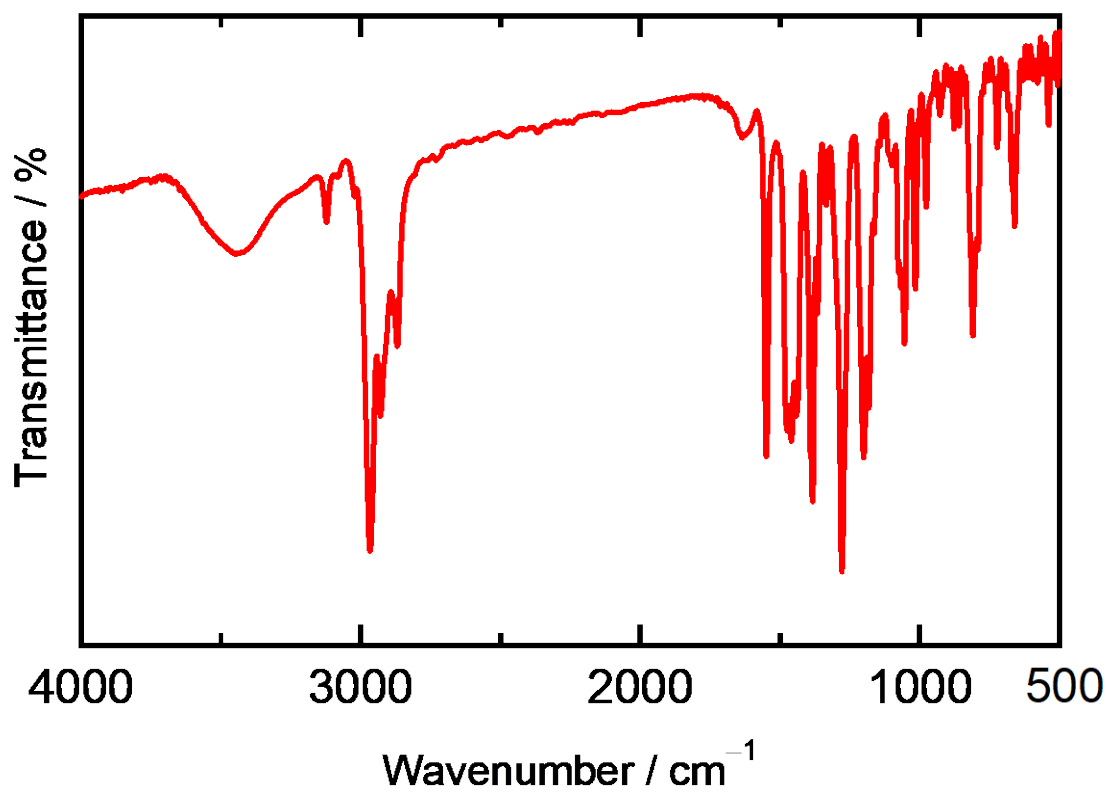

Figure S8. IR spectrum of  $[\text{Ni}(\kappa^2\text{-NO}_2)(\text{L1}'')_2](\text{I}_3)$  (KBr) at room temperature.

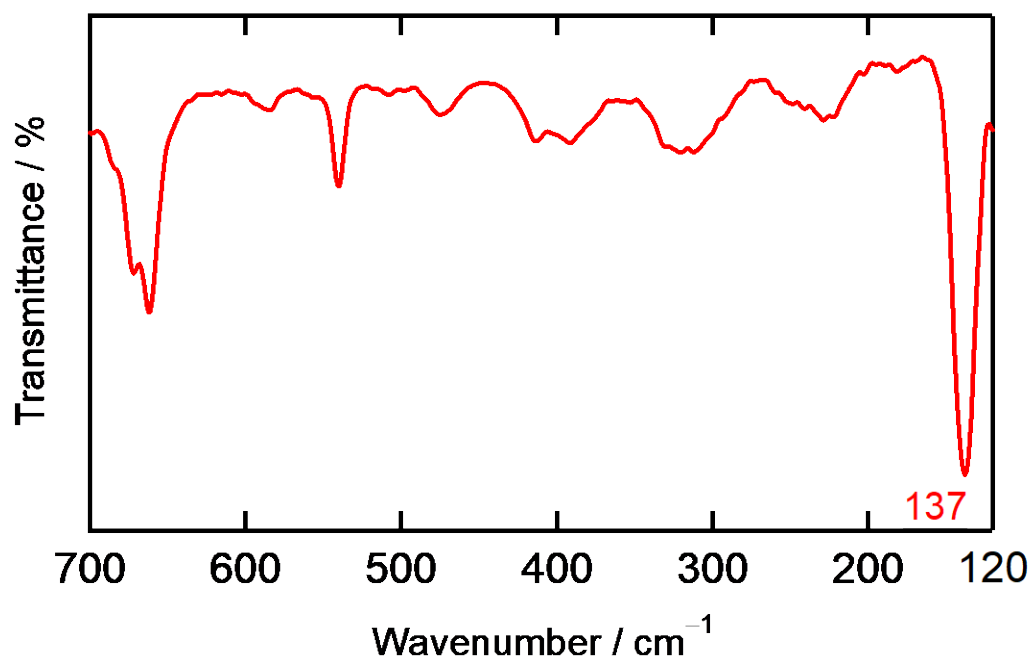

Figure S9. Far-IR spectrum of  $[\text{Ni}(\kappa^2\text{-NO}_2)(\text{L1}'')_2](\text{I}_3)$  (CsI) at room temperature.

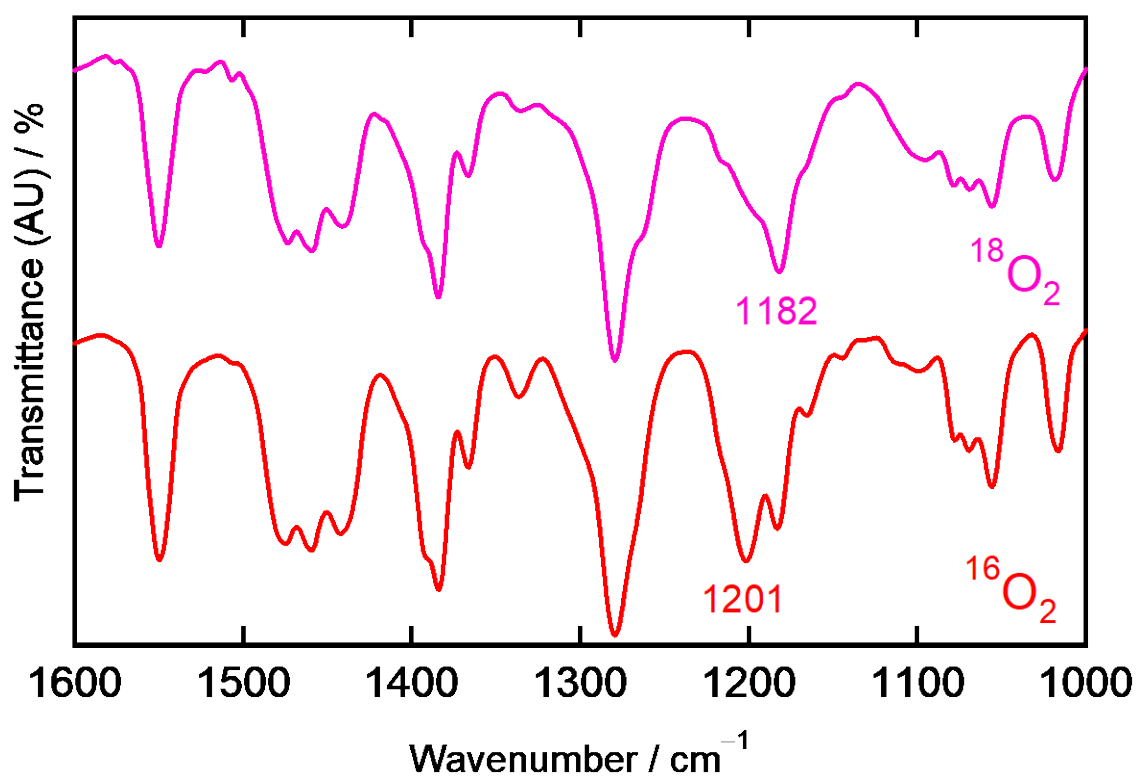

**Figure S10.** IR spectral comparisons of the products obtained from the reaction of  $[\text{Ni}(\text{NO})(\text{I})(\text{L1}'')]$  with  $^{16}\text{O}_2$  (bottom) and  $^{18}\text{O}_2$  (top) (KBr).

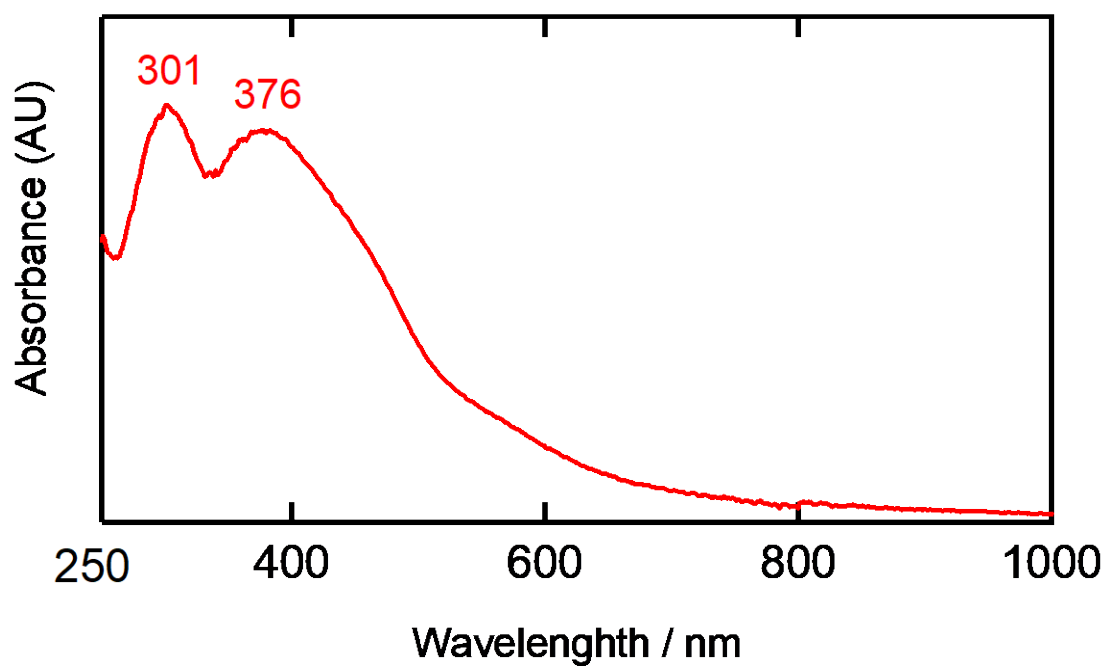

**Figure S11.** UV-Vis spectrum of  $[\text{Ni}(\kappa^2\text{-O}_2\text{N})(\text{L1}'')_2](\text{I}_3)$  in the solid state (nujol) at room temperature.

**Table S1.** XYZ coordinates for the optimized structure of [Ni(NO)(I)(L1'')] using the BP86 functional for the closed-shell system.

|    | x        | y        | z        |
|----|----------|----------|----------|
| I  | -0.0069  | -1.93962 | 2.2655   |
| Ni | -0.00424 | -1.45249 | -0.3308  |
| O  | -0.01192 | -4.12034 | -1.16455 |
| N  | -0.00858 | -2.96171 | -0.9884  |
| N  | 1.42264  | -0.02659 | -0.45349 |
| N  | 1.2074   | 1.22552  | 0.05015  |
| N  | -1.42227 | -0.01791 | -0.45408 |
| N  | -1.19956 | 1.23287  | 0.04961  |
| C  | 4.04618  | -0.86909 | -2.94939 |
| H  | 4.40322  | -1.79056 | -3.43226 |
| H  | 3.46637  | -0.29785 | -3.68923 |
| H  | 4.93401  | -0.27578 | -2.67907 |
| C  | 4.01726  | -2.03037 | -0.68547 |
| H  | 4.38872  | -2.95886 | -1.1452  |
| H  | 4.88591  | -1.45542 | -0.32786 |
| H  | 3.40048  | -2.29753 | 0.18396  |
| C  | 3.20464  | -1.21257 | -1.71115 |
| H  | 2.34879  | -1.83195 | -2.03027 |
| C  | 2.62057  | 0.01506  | -1.06519 |
| C  | 3.16972  | 1.31204  | -0.94158 |
| H  | 4.12044  | 1.65629  | -1.33383 |
| C  | 2.25143  | 2.07094  | -0.22504 |
| C  | 2.31399  | 3.49668  | 0.25745  |
| H  | 1.28808  | 3.9089   | 0.23428  |
| C  | 3.17481  | 4.36501  | -0.67355 |
| H  | 3.16299  | 5.41109  | -0.33452 |
| H  | 4.22242  | 4.0282   | -0.66993 |
| H  | 2.80888  | 4.33261  | -1.70945 |
| C  | 2.82546  | 3.57623  | 1.71265  |
| H  | 2.81583  | 4.61794  | 2.06757  |
| H  | 2.21288  | 2.97452  | 2.39968  |
| H  | 3.85769  | 3.20096  | 1.77562  |
| C  | -4.02799 | -2.00651 | -0.68596 |
| H  | -4.40512 | -2.9327  | -1.14572 |
| H  | -3.41226 | -2.27749 | 0.18302  |
| H  | -4.89306 | -1.42662 | -0.32766 |
| C  | -4.05152 | -0.84457 | -2.94959 |



|   |          |          |          |
|---|----------|----------|----------|
| H | -4.41419 | -1.76385 | -3.43241 |
| H | -4.93574 | -0.24618 | -2.6786  |
| H | -3.46887 | -0.27654 | -3.68967 |
| C | -3.21126 | -1.19316 | -1.71191 |
| H | -2.35916 | -1.81738 | -2.03164 |
| C | -2.61982 | 0.03096  | -1.06597 |
| C | -3.16115 | 1.33124  | -0.94246 |
| H | -4.1097  | 1.68122  | -1.33491 |
| C | -2.23842 | 2.08458  | -0.22576 |
| C | -2.29239 | 3.51069  | 0.25668  |
| H | -1.26399 | 3.91668  | 0.23353  |
| C | -3.1479  | 4.38417  | -0.67439 |
| H | -3.12978 | 5.43016  | -0.3354  |
| H | -2.78213 | 4.34951  | -1.71027 |
| H | -4.19752 | 4.05367  | -0.67079 |
| C | -2.80343 | 3.59341  | 1.71186  |
| H | -2.78741 | 4.63504  | 2.06676  |
| H | -3.83795 | 3.2245   | 1.77479  |
| H | -2.1946  | 2.98795  | 2.39893  |
| C | 0.00439  | 1.44078  | 0.83361  |
| H | 0.00741  | 2.46508  | 1.21686  |
| H | 0.00196  | 0.7082   | 1.66533  |

---

**Table S2.** XYZ coordinates for the optimized structure of [Ni(NO)(I)(L1'')] using the B3LYP functional for the closed-shell system.

|    | x        | y        | z        |
|----|----------|----------|----------|
| I  | -0.01144 | -2.01811 | 2.25943  |
| Ni | -0.0075  | -1.48867 | -0.34956 |
| O  | -0.02014 | -4.1182  | -1.18563 |
| N  | -0.01469 | -2.97396 | -1.02121 |
| N  | 1.43765  | -0.01102 | -0.46159 |
| N  | 1.20877  | 1.22476  | 0.05333  |
| N  | -1.43725 | 0.00371  | -0.46217 |
| N  | -1.19576 | 1.23716  | 0.05258  |
| C  | 3.95242  | -0.81059 | -3.01799 |
| H  | 4.32475  | -1.71634 | -3.49969 |
| H  | 3.28691  | -0.30326 | -3.71856 |
| H  | 4.81135  | -0.16017 | -2.83609 |
| C  | 4.16476  | -1.9033  | -0.73825 |
| H  | 4.55593  | -2.81079 | -1.20283 |
| H  | 5.01344  | -1.27406 | -0.45921 |
| H  | 3.63609  | -2.18602 | 0.17232  |
| C  | 3.23147  | -1.1657  | -1.71305 |
| H  | 2.40297  | -1.83692 | -1.95159 |
| C  | 2.62687  | 0.04243  | -1.05574 |
| C  | 3.16842  | 1.33516  | -0.91275 |
| H  | 4.11308  | 1.68582  | -1.28858 |
| C  | 2.24541  | 2.07155  | -0.19869 |
| C  | 2.30302  | 3.48909  | 0.30031  |
| H  | 1.28806  | 3.89993  | 0.27006  |
| C  | 3.17183  | 4.36847  | -0.60516 |
| H  | 3.15184  | 5.40148  | -0.25449 |
| H  | 4.21208  | 4.03786  | -0.59452 |
| H  | 2.8205   | 4.35044  | -1.6374  |
| C  | 2.79513  | 3.54934  | 1.75802  |
| H  | 2.78021  | 4.57844  | 2.12243  |
| H  | 2.17853  | 2.9445   | 2.42461  |
| H  | 3.81856  | 3.17695  | 1.82973  |
| C  | -4.18056 | -1.8625  | -0.73699 |
| H  | -4.58096 | -2.76613 | -1.2012  |
| H  | -3.65254 | -2.15049 | 0.17232  |
| H  | -5.02286 | -1.22568 | -0.45584 |
| C  | -3.96311 | -0.77047 | -3.01658 |

|   |          |          |          |
|---|----------|----------|----------|
| H | -4.34461 | -1.67253 | -3.49803 |
| H | -4.81577 | -0.11248 | -2.83245 |
| H | -3.29455 | -0.26872 | -3.71827 |
| C | -3.24267 | -1.13288 | -1.7134  |
| H | -2.42083 | -1.81151 | -1.95406 |
| C | -2.62572 | 0.06928  | -1.05659 |
| C | -3.15393 | 1.36758  | -0.91405 |
| H | -4.09478 | 1.7279   | -1.29026 |
| C | -2.22354 | 2.09453  | -0.1999  |
| C | -2.26657 | 3.51273  | 0.29868  |
| H | -1.24735 | 3.91296  | 0.26868  |
| C | -3.12582 | 4.40086  | -0.60737 |
| H | -3.09523 | 5.43371  | -0.25699 |
| H | -2.77432 | 4.37885  | -1.63947 |
| H | -4.16946 | 4.08106  | -0.59701 |
| C | -2.75855 | 3.57856  | 1.75619  |
| H | -2.73293 | 4.60755  | 2.12033  |
| H | -3.78586 | 3.217    | 1.82763  |
| H | -2.14859 | 2.96746  | 2.42318  |
| C | 0.00728  | 1.42866  | 0.83483  |
| H | 0.01235  | 2.43737  | 1.22887  |
| H | 0.00329  | 0.70269  | 1.65356  |

---

**Table S3.** XYZ coordinates for the optimized structure of [Ni(NO)(I)(L1'')] using the B3LYP functional for the broken-symmetry system.

|    | x        | y        | z        |
|----|----------|----------|----------|
| I  | -0.15856 | -1.98903 | 2.30843  |
| Ni | -0.11274 | -1.48798 | -0.30096 |
| O  | -0.32003 | -4.12078 | -1.42972 |
| N  | -0.22962 | -2.9974  | -1.11829 |
| N  | 1.44023  | -0.1232  | -0.43938 |
| N  | 1.2946   | 1.13567  | 0.05043  |
| N  | -1.43748 | 0.09681  | -0.44611 |
| N  | -1.10381 | 1.31942  | 0.04314  |
| C  | 3.74115  | -1.15505 | -3.05453 |
| H  | 4.06085  | -2.09225 | -3.51344 |
| H  | 3.0072   | -0.68817 | -3.71354 |
| H  | 4.61367  | -0.49944 | -3.00243 |
| C  | 4.17916  | -2.11076 | -0.74466 |
| H  | 4.51336  | -3.04957 | -1.19069 |
| H  | 5.05738  | -1.47886 | -0.59136 |
| H  | 3.74421  | -2.33269 | 0.23022  |
| C  | 3.15616  | -1.42123 | -1.66217 |
| H  | 2.30294  | -2.09394 | -1.7732  |
| C  | 2.63341  | -0.16498 | -1.02576 |
| C  | 3.26353  | 1.08917  | -0.90287 |
| H  | 4.23343  | 1.36484  | -1.27711 |
| C  | 2.39062  | 1.90164  | -0.20904 |
| C  | 2.54673  | 3.31983  | 0.26651  |
| H  | 1.5634   | 3.8006   | 0.22572  |
| C  | 3.47803  | 4.12013  | -0.65013 |
| H  | 3.53029  | 5.15766  | -0.3167  |
| H  | 4.4922   | 3.71694  | -0.62986 |
| H  | 3.12915  | 4.10967  | -1.6833  |
| C  | 3.03813  | 3.36903  | 1.72489  |
| H  | 3.09549  | 4.40254  | 2.07206  |
| H  | 2.37838  | 2.82089  | 2.39917  |
| H  | 4.03229  | 2.92616  | 1.80655  |
| C  | -4.34675 | -1.53735 | -0.68708 |
| H  | -4.817   | -2.418   | -1.12911 |
| H  | -3.86479 | -1.83878 | 0.24329  |
| H  | -5.13393 | -0.81838 | -0.44728 |
| C  | -3.9859  | -0.55416 | -2.9985  |

|   |          |          |          |
|---|----------|----------|----------|
| H | -4.43799 | -1.43562 | -3.45628 |
| H | -4.77817 | 0.18503  | -2.85789 |
| H | -3.26014 | -0.14189 | -3.7016  |
| C | -3.32773 | -0.93103 | -1.66654 |
| H | -2.56643 | -1.68924 | -1.86394 |
| C | -2.62066 | 0.23621  | -1.03803 |
| C | -3.05203 | 1.57212  | -0.92038 |
| H | -3.96586 | 1.99235  | -1.30107 |
| C | -2.06818 | 2.24336  | -0.22348 |
| C | -2.00631 | 3.67063  | 0.24634  |
| H | -0.96021 | 3.99331  | 0.2104   |
| C | -2.79693 | 4.60123  | -0.67939 |
| H | -2.69    | 5.63587  | -0.35002 |
| H | -2.44754 | 4.53215  | -1.71012 |
| H | -3.86137 | 4.35991  | -0.66456 |
| C | -2.49299 | 3.80196  | 1.70122  |
| H | -2.39092 | 4.8333   | 2.0446   |
| H | -3.54444 | 3.51961  | 1.77777  |
| H | -1.9307  | 3.16071  | 2.38167  |
| C | 0.10906  | 1.4362   | 0.82556  |
| H | 0.18531  | 2.44778  | 1.20444  |
| H | 0.05181  | 0.72483  | 1.65536  |

---

**Table S4.** XYZ coordinates for the optimized structure of [Ni( $\kappa^2$ -O<sub>2</sub>N)(L1'')<sub>2</sub>] using the BP86 functional.

|    | x        | y        | z        |
|----|----------|----------|----------|
| Ni | -0.04748 | 0.08459  | -0.79287 |
| O  | 0.39703  | 0.89362  | -2.68722 |
| O  | -0.66772 | -0.92188 | -2.62159 |
| N  | -0.15382 | -0.03331 | -3.3666  |
| N  | -0.69069 | -1.10983 | 0.84231  |
| N  | -2.00033 | -1.52401 | 0.83014  |
| N  | -2.02062 | 0.90739  | -0.97047 |
| N  | -3.0645  | 0.06677  | -0.66508 |
| N  | 1.7569   | -1.02714 | -1.03329 |
| N  | 2.95211  | -0.36436 | -0.93267 |
| N  | 0.90538  | 1.57128  | 0.40069  |
| N  | 2.28076  | 1.60039  | 0.33116  |
| C  | 2.09711  | -2.56824 | 2.37328  |
| H  | 3.10982  | -2.36876 | 2.75414  |
| H  | 1.66773  | -3.37997 | 2.98016  |
| H  | 2.18781  | -2.92042 | 1.33872  |
| C  | 1.28103  | -0.75488 | 3.91435  |
| H  | 2.32086  | -0.54264 | 4.20228  |
| H  | 0.69891  | 0.16735  | 4.03101  |
| H  | 0.89061  | -1.49818 | 4.62605  |
| C  | 1.23836  | -1.29179 | 2.47064  |
| H  | 1.66862  | -0.53389 | 1.80033  |
| C  | -0.18046 | -1.54178 | 2.01686  |
| C  | -1.17268 | -2.24795 | 2.73326  |
| H  | -1.0607  | -2.71572 | 3.7053   |
| C  | -2.32553 | -2.22833 | 1.96218  |
| C  | -3.69529 | -2.78623 | 2.25295  |
| H  | -4.16892 | -3.06391 | 1.29439  |
| C  | -3.60954 | -4.06529 | 3.10209  |
| H  | -4.61449 | -4.48412 | 3.25226  |
| H  | -2.98629 | -4.83136 | 2.62035  |
| H  | -3.18878 | -3.854   | 4.09631  |
| C  | -4.58801 | -1.72788 | 2.93711  |
| H  | -5.60128 | -2.12593 | 3.09274  |
| H  | -4.17434 | -1.45394 | 3.91878  |
| H  | -4.66733 | -0.80775 | 2.33977  |
| C  | -1.82614 | 3.26296  | -3.50658 |
| H  | -1.21893 | 4.10724  | -3.86527 |

|   |          |          |          |
|---|----------|----------|----------|
| H | -1.43295 | 2.34403  | -3.95835 |
| H | -2.85581 | 3.41351  | -3.86545 |
| C | -2.31328 | 4.53415  | -1.38116 |
| H | -1.67091 | 5.36741  | -1.70137 |
| H | -3.33084 | 4.74906  | -1.7415  |
| H | -2.3405  | 4.52363  | -0.28361 |
| C | -1.7897  | 3.20857  | -1.96403 |
| H | -0.74511 | 3.06062  | -1.64737 |
| C | -2.58349 | 2.0311   | -1.459   |
| C | -3.99122 | 1.89771  | -1.45806 |
| H | -4.71236 | 2.64097  | -1.78012 |
| C | -4.27882 | 0.63447  | -0.96578 |
| C | -5.59988 | -0.07653 | -0.81851 |
| H | -5.52336 | -0.77013 | 0.03815  |
| C | -5.92879 | -0.90521 | -2.08039 |
| H | -6.87301 | -1.45159 | -1.94137 |
| H | -6.03995 | -0.24613 | -2.95367 |
| H | -5.14287 | -1.63786 | -2.31665 |
| C | -6.73383 | 0.9129   | -0.50326 |
| H | -7.67497 | 0.36793  | -0.34436 |
| H | -6.52007 | 1.50219  | 0.39936  |
| H | -6.89422 | 1.61016  | -1.3388  |
| C | -2.78114 | -1.32773 | -0.3765  |
| H | -2.23779 | -1.75974 | -1.22954 |
| H | -3.73486 | -1.84877 | -0.25422 |
| C | 1.23483  | -4.64042 | -0.79256 |
| H | 0.48107  | -5.39223 | -1.06918 |
| H | 2.22431  | -5.08592 | -0.97633 |
| H | 1.14204  | -4.45008 | 0.28496  |
| C | 1.03907  | -3.70913 | -3.13457 |
| H | 0.24849  | -4.44068 | -3.35798 |
| H | 0.86664  | -2.81967 | -3.75362 |
| H | 2.00158  | -4.15586 | -3.42713 |
| C | 1.02937  | -3.36489 | -1.62959 |
| H | 0.04703  | -2.93585 | -1.38262 |
| C | 2.06324  | -2.30356 | -1.34203 |
| C | 3.46805  | -2.44235 | -1.43467 |
| H | 4.0158   | -3.35037 | -1.66266 |
| C | 4.01745  | -1.19309 | -1.1879  |
| C | 5.45026  | -0.72786 | -1.24228 |

|   |          |          |          |
|---|----------|----------|----------|
| H | 5.57393  | 0.0898   | -0.50942 |
| C | 5.80211  | -0.17541 | -2.64173 |
| H | 6.83598  | 0.19919  | -2.65396 |
| H | 5.71606  | -0.96767 | -3.39957 |
| H | 5.13856  | 0.64772  | -2.9457  |
| C | 6.41828  | -1.85232 | -0.8396  |
| H | 7.45054  | -1.47509 | -0.83184 |
| H | 6.1887   | -2.24885 | 0.15925  |
| H | 6.37767  | -2.68498 | -1.55734 |
| C | -0.99494 | 4.15351  | 2.12776  |
| H | -2.0517  | 4.40355  | 2.3018   |
| H | -0.43565 | 4.46035  | 3.02475  |
| H | -0.6321  | 4.75421  | 1.28251  |
| C | -1.3215  | 1.85455  | 3.105    |
| H | -2.35757 | 2.13563  | 3.34587  |
| H | -1.29262 | 0.76995  | 2.93776  |
| H | -0.70344 | 2.08717  | 3.98593  |
| C | -0.84388 | 2.64086  | 1.87028  |
| H | -1.48296 | 2.35872  | 1.02073  |
| C | 0.5775   | 2.32556  | 1.47202  |
| C | 1.75054  | 2.82953  | 2.07747  |
| H | 1.80456  | 3.483    | 2.94111  |
| C | 2.82464  | 2.36738  | 1.33289  |
| C | 4.30308  | 2.59164  | 1.52092  |
| H | 4.77608  | 2.63809  | 0.52331  |
| C | 4.94802  | 1.42313  | 2.29768  |
| H | 6.0347   | 1.57168  | 2.37762  |
| H | 4.53653  | 1.36757  | 3.31629  |
| H | 4.76834  | 0.45442  | 1.80886  |
| C | 4.5826   | 3.93362  | 2.21672  |
| H | 5.66651  | 4.10101  | 2.28648  |
| H | 4.13979  | 4.77594  | 1.66741  |
| H | 4.18172  | 3.94056  | 3.24119  |
| C | 2.92957  | 1.08588  | -0.86131 |
| H | 2.39882  | 1.47504  | -1.74256 |
| H | 3.96385  | 1.44168  | -0.87032 |

---
